# Supplementary material
Source: PubMed Central journal article supplement (PMC8180484)
Supplement: NIHMS1657577-supplement-1.pdf [file NIHMS1657577-supplement-1.pdf]

# Attitudes Towards Implementing Lung Cancer Screening in the VA

## Please answer the following demographic questions :

Which best describes your gender?

- Man
- Woman
- Other
- Decline to state

How old are you?

\_\_\_\_\_

(years old)

How long have you worked at the VA?

\_\_\_\_\_

(years)

What is your current VA role? (check all that apply)

- Administrative - Clinic Scheduler
- Administrative - Clinical Informatics, Decision Support System
- Administrative - Executive Leader, Division Chief, Section Chief
- Administrative or clerical employee working in a clinical area (for example a Ward Secretary, Radiology Receptionist)
- Administrative - Other
- Nursing - RN
- Nursing - LPN
- Nursing - Nursing Assistant
- Nursing - Advanced Practice Registered Nurse (APRN)
- Nursing - Other
- Other Clinical - Diagnostic Imaging Technician (for example Diagnostic X-Ray or Nuclear Medicine technician)
- Other Clinical - Psychologist
- Other Clinical - Social Worker
- Other Clinical - Other hands on direct patient care provider
- Physician Assistant
- Physician - Attending
- Physician - Physician-in-Training

How long have you been in your current role?

\_\_\_\_\_

(years)

---

Which best describes your area of clinical practice?

- Primary Care - Family Practice/Family Medicine
- Primary Care - Geriatrics
- Primary Care - General Internal Medicine
- Primary Care - Women's Health
- Internal Medicine Hospitalist Service
- Radiology
- Health Behavior Coordinator (for example smoking cessation)
- I do not currently provide clinical service

---

Within which VA healthcare system do you work?

- Phoenix VA Health Care System
- Michael E. DeBakey VA Medical Center (Houston)
- Bay Pines VA Healthcare System
- Veteran Health Indiana
- Jesse Brown VA Medical Center (Chicago)
- Tennessee Valley Healthcare System
- Kansas City VA Medical Center
- Corporal Michael J. Crescenz VA Medical Center (Philadelphia)
- VA New York Harbor Health Care System
- VA Greater Los Angeles Healthcare System

---

In which clinical setting, do you primarily work?

- Community-based Outpatient Clinic (CBOC) or Annex
- Hospital-based Clinic

**In the coming months, your VA is going to start a lung cancer screening program for certain patients. This program will include the following:**

- 1. Identification of patients who are appropriate for screening (older persons, heavy smokers)**
- 2. Providers and patients discuss the benefits and risks of screening (shared decision-making)**
- 3. Provider orders screening test or refers the patient for screening**
- 4. Appointments for smoking cessation and screening are scheduled**
- 5. Smoking cessation services offered**
- 6. Screening study (CT scan) is performed**
- 7. Radiologist interprets the screening study**
- 8. Multi-disciplinary case review is performed as needed**
- 9. Screening results are sent to the referring provider**
- 10. Referring provider discusses the screening results with the patient**
- 11. Annual screening follow up or further evaluation is scheduled**

**Please rate your agreement with each statement regarding this new lung cancer screening program.**

|                                                                                                    | (Strongly Disagree) 1 | 2                     | 3                     | (Neutral) 4           | 5                     | 6                     | (Strongly Agree) 7    |
|----------------------------------------------------------------------------------------------------|-----------------------|-----------------------|-----------------------|-----------------------|-----------------------|-----------------------|-----------------------|
| My VA can coordinate tasks so that implementation of a lung cancer screening program goes smoothly | <input type="radio"/> |
| My VA can support people as they adjust to a lung cancer screening program                         | <input type="radio"/> |
| My VA can handle the challenges that might arise in implementing a lung cancer screening program   | <input type="radio"/> |
| My VA can keep track of progress in implementing a lung cancer screening program                   | <input type="radio"/> |
| My VA can manage the politics of implementing a lung cancer screening program                      | <input type="radio"/> |

**In the coming months, your VA is going to start a lung cancer screening program for certain patients. This program will include the following:**

- 1. Identification of patients who are appropriate for screening (older persons, heavy smokers)**
- 2. Providers and patients discuss the benefits and risks of screening (shared decision-making)**
- 3. Provider orders screening test or refers the patient for screening**
- 4. Appointments for smoking cessation and screening are scheduled**
- 5. Smoking cessation services offered**
- 6. Screening study (CT scan) is performed**
- 7. Radiologist interprets the screening study**
- 8. Multi-disciplinary case review is performed as needed**
- 9. Screening results are sent to the referring provider**
- 10. Referring provider discusses the screening results with the patient**
- 11. Annual screening follow up or further evaluation is scheduled**

**Please rate your agreement with each statement regarding this new lung cancer screening program.**

|                                                                    | (Strongly Disagree) 1 | 2                     | 3                     | (Neutral) 4           | 5                     | 6                     | (Strongly Agree) 7    |
|--------------------------------------------------------------------|-----------------------|-----------------------|-----------------------|-----------------------|-----------------------|-----------------------|-----------------------|
| My VA is committed to implementing a lung cancer screening program | <input type="radio"/> |
| My VA is determined to implement a lung cancer screening program   | <input type="radio"/> |
| My VA is motivated to implement a lung cancer screening program    | <input type="radio"/> |
| My VA wants to implement a lung cancer screening program           | <input type="radio"/> |

**In the coming months, your VA is going to start a lung cancer screening program for certain patients. This program will include the following:**

- 1. Identification of patients who are appropriate for screening (older persons, heavy smokers)**
- 2. Providers and patients discuss the benefits and risks of screening (shared decision-making)**
- 3. Provider orders screening test or refers the patient for screening**
- 4. Appointments for smoking cessation and screening are scheduled**
- 5. Smoking cessation services offered**
- 6. Screening study (CT scan) is performed**
- 7. Radiologist interprets the screening study**
- 8. Multi-disciplinary case review is performed as needed**
- 9. Screening results are sent to the referring provider**
- 10. Referring provider discusses the screening results with the patient**
- 11. Annual screening follow up or further evaluation is scheduled**

**Please rate your agreement with each statement regarding this new lung cancer screening program.**

|                                                                             | (Strongly Disagree) 1 | 2                     | 3                     | (Neutral) 4           | 5                     | 6                     | (Strongly Agree) 7    |
|-----------------------------------------------------------------------------|-----------------------|-----------------------|-----------------------|-----------------------|-----------------------|-----------------------|-----------------------|
| A lung cancer screening program is compatible with my VA's values           | <input type="radio"/> |
| My VA needs to implement a lung cancer screening program                    | <input type="radio"/> |
| My VA believes a lung cancer screening program will benefit our hospital    | <input type="radio"/> |
| My VA believes it is necessary to implement a lung cancer screening program | <input type="radio"/> |
| My VA believes a lung cancer screening program will work                    | <input type="radio"/> |
| My VA sees a lung cancer screening program as timely                        | <input type="radio"/> |
| My VA believes a lung cancer screening program is cost-effective            | <input type="radio"/> |
| My VA believes a lung cancer screening program will make things better      | <input type="radio"/> |

My VA feels that implementing a lung cancer screening program is a good idea

My VA values a lung cancer screening program

---

Would you have a decision-making role in the development of a lung screening program?

- Yes
- No
